# Supplementary material
Source: HighWire-hosted journal article supplement (https://www.cmajopen.ca/highwire/filestream/89120/field_highwire_adjunct_files/0/open-2021-0319-1-at.pdf)
Supplement: open-2021-0319-1-at.pdf [file open-2021-0319-1-at.pdf]

|                                           |                                                                                                                                                                                                        |
|-------------------------------------------|--------------------------------------------------------------------------------------------------------------------------------------------------------------------------------------------------------|
| Neuro-ophthalmologist                     | ≥ 50 A/C/W231                                                                                                                                                                                          |
| Corneal surgeon                           | ≥ 10 E121, E122, E124 (any combination)                                                                                                                                                                |
| Glaucoma surgeon                          | ≥ 50 E132                                                                                                                                                                                              |
| Retina medical ophthalmologist            | ≥ 300 E147, E149 (any combination) AND ≥ 100 E154, EXCLUDING those who bill ANY ONE of the following retinal surgery codes E148, E142, E152                                                            |
| Retinal surgeon                           | ≥15 E142, E148, E152 (any combination)                                                                                                                                                                 |
| Oculoplastic surgeon                      | ≥ 20 E166, E167, E172, E168, E165, E169, E170, E160, E163, E176, E177, E178, E179, E180, E215, E216, E217, E218, E219 (any combination)                                                                |
| Pediatric ophthalmologist**               | ≥50 E159, E158, E162, E949, E952 OR ≥ 50% of all following code submissions A/C236, C235, A/C233, A/C234 conducted on pediatric patients AND does not meet the criteria of any of the above categories |
| Low vision rehabilitation ophthalmologist | ≥50 A252, A254 (any combination)                                                                                                                                                                       |

|                                                |                                                                                                                                                                                                                                                                                                                                                                                                     |
|------------------------------------------------|-----------------------------------------------------------------------------------------------------------------------------------------------------------------------------------------------------------------------------------------------------------------------------------------------------------------------------------------------------------------------------------------------------|
| Low-volume comprehensive cataract surgeon      | ≥1 but <200 E140 AND does not meet the criteria of any of the above categories                                                                                                                                                                                                                                                                                                                      |
| Moderate-volume comprehensive cataract surgeon | 200-800 E140 AND does not meet the criteria of any of the above categories                                                                                                                                                                                                                                                                                                                          |
| High-volume comprehensive cataract surgeon     | >800 E140 AND does not meet the criteria of any of the above categories                                                                                                                                                                                                                                                                                                                             |
| General medical ophthalmologist                | ≥100 A235, C235, W535, A233, C233, A234, C234, A253, A256, A236, C236, W536 (any combination), EXCLUDING THOSE WHO BILLED ANY one of the following surgical codes E132, E214, E940, E142, E148, E152, E121, E122, E124, E159, E158, E162, E140, E166, E167, E172, E168, E165, E169, E170, E160, E163, E176, E177, E178, E179, E180, E215, E216, E217, E218, E219 AND no fit into any above category |

**Supplementary Table 1:** Ontario Health Insurance Plan (OHIP) coding details of the classification criteria for the inclusion of ophthalmologists to an area of care in each fiscal year for 2010-2019 fiscal years, inclusive

\*All fee-for-service (FFS) and shadow billing professional claims were considered to capture ophthalmologists under different payment plans

\*\* Pediatric population considered patients younger than 18 years old

≥ means “Greater than or equal to”
